# Supplementary material for: Validation of the Korean Version of the Patient-Reported Outcomes Measurement Information System 29 Profile V2.1 among Cancer Survivors
Source: PubMed Central journal article supplement — Cancer Res Treat. 2021 Apr 9;54(1):10–9. doi: 10.4143/crt.2020.1200 (PMC8756127; doi:10.4143/crt.2020.1200), 2021-04-09
Supplement: crt-2020-1200_S2_Table.pdf [file crt-2020-1200_S2_Table.pdf]

**S2 Table.** Exploratory factor analysis of the K-PROMIS-29 items (unrotated)

| Original domain and items                                                      | Factor loading |       |       |       |       |       |       |
|--------------------------------------------------------------------------------|----------------|-------|-------|-------|-------|-------|-------|
|                                                                                | F1             | F2    | F3    | F4    | F5    | F6    | F7    |
| <b>Physical function</b>                                                       |                |       |       |       |       |       |       |
| Are you able to do chores such as vacuuming or yard work?                      | <b>0.69</b>    | 0.17  | 0.20  | -0.18 | 0.33  | 0.11  | -0.13 |
| Are you able to go up and down stairs at a normal pace?                        | <b>0.63</b>    | 0.23  | 0.20  | -0.29 | 0.27  | 0.19  | -0.13 |
| Are you able to go for a walk of at least 15 minutes?                          | <b>0.55</b>    | 0.18  | 0.26  | -0.22 | 0.43  | 0.13  | -0.30 |
| Are you able to run errands and shop?                                          | <b>0.63</b>    | 0.17  | 0.27  | -0.18 | 0.41  | 0.17  | -0.18 |
| <b>Anxiety</b>                                                                 |                |       |       |       |       |       |       |
| In the past 7 days, I felt fearful                                             | <b>0.60</b>    | -0.48 | -0.08 | 0.13  | 0.07  | 0.16  | -0.04 |
| In the past 7 days, I found it hard to focus on anything other than my anxiety | <b>0.65</b>    | -0.43 | -0.07 | 0.17  | 0.10  | 0.15  | -0.03 |
| In the past 7 days, my worries overwhelmed me                                  | <b>0.60</b>    | -0.58 | -0.11 | 0.19  | 0.07  | 0.14  | -0.02 |
| In the past 7 days, I felt uneasy                                              | <b>0.69</b>    | -0.48 | -0.06 | 0.20  | 0.04  | 0.15  | 0.00  |
| <b>Depression</b>                                                              |                |       |       |       |       |       |       |
| In the past 7 days, I felt worthless                                           | <b>0.64</b>    | -0.43 | 0.05  | 0.23  | -0.04 | -0.08 | -0.07 |
| In the past 7 days, I felt helpless                                            | <b>0.72</b>    | -0.39 | 0.07  | 0.13  | -0.03 | -0.10 | -0.09 |
| In the past 7 days, I felt depressed                                           | <b>0.67</b>    | -0.52 | 0.05  | 0.12  | -0.01 | 0.00  | 0.01  |
| In the past 7 days, I felt hopeless                                            | <b>0.66</b>    | -0.45 | 0.06  | 0.12  | 0.01  | -0.06 | 0.02  |
| <b>Fatigue</b>                                                                 |                |       |       |       |       |       |       |
| During the past 7 days, I feel fatigued                                        | <b>0.74</b>    | -0.09 | 0.14  | -0.25 | 0.07  | -0.30 | 0.23  |
| During the past 7 days, I had trouble starting things because I was tired      | <b>0.77</b>    | 0.02  | 0.16  | -0.28 | 0.05  | -0.26 | 0.21  |

|                                                                                                        |             |       |              |       |       |       |       |
|--------------------------------------------------------------------------------------------------------|-------------|-------|--------------|-------|-------|-------|-------|
| In the past 7 days, how run-down did you feel on average?                                              | <b>0.78</b> | -0.04 | 0.09         | -0.25 | -0.03 | -0.34 | 0.29  |
| In the past 7 days, how fatigued were you on average?                                                  | <b>0.79</b> | -0.05 | 0.05         | -0.26 | 0.03  | -0.32 | 0.30  |
| <b>Sleep disturbance</b>                                                                               |             |       |              |       |       |       |       |
| In the past 7 days, my sleep quality was...                                                            | -0.40       | 0.01  | <b>0.64</b>  | 0.25  | 0.08  | 0.29  | 0.39  |
| In the past 7 days, my sleep was refreshing                                                            | -0.41       | 0.04  | <b>0.56</b>  | 0.26  | 0.14  | 0.33  | 0.47  |
| In the past 7 days, I had a problem with my sleep                                                      | 0.36        | 0.10  | <b>-0.72</b> | -0.19 | 0.15  | 0.33  | 0.27  |
| In the past 7 days, I had difficulty falling asleep                                                    | 0.37        | 0.09  | <b>-0.70</b> | -0.19 | 0.13  | 0.36  | 0.31  |
| <b>Ability to participate in social roles and activities</b>                                           |             |       |              |       |       |       |       |
| I have trouble doing all of my regular leisure activities with others                                  | <b>0.67</b> | 0.14  | 0.09         | -0.20 | -0.52 | 0.25  | -0.09 |
| I have trouble doing all of the family activities that I want to do                                    | <b>0.78</b> | 0.16  | 0.13         | -0.10 | -0.41 | 0.18  | -0.02 |
| I have trouble doing all of my usual work (include work at home)                                       | <b>0.78</b> | 0.19  | 0.16         | -0.13 | -0.32 | 0.16  | 0.01  |
| I have trouble doing all of the activities with friends that I want to do                              | <b>0.71</b> | 0.13  | 0.19         | -0.12 | -0.47 | 0.25  | -0.04 |
| <b>Pain interference</b>                                                                               |             |       |              |       |       |       |       |
| In the past 7 days, how much did pain interfere with your day to day activities?                       | <b>0.69</b> | 0.50  | -0.10        | 0.34  | 0.03  | -0.12 | 0.03  |
| In the past 7 days, how much did pain interfere with work around the home?                             | <b>0.72</b> | 0.51  | -0.09        | 0.36  | 0.05  | -0.09 | 0.01  |
| In the past 7 days, how much did pain interfere with your ability to participate in social activities? | <b>0.70</b> | 0.45  | -0.02        | 0.37  | -0.09 | -0.04 | -0.04 |
| In the past 7 days, how much did pain interfere with your household chores?                            | <b>0.71</b> | 0.48  | -0.05        | 0.37  | 0.06  | 0.02  | 0.02  |
| <b>Pain intensity</b>                                                                                  |             |       |              |       |       |       |       |
| In the past 7 days, how would you rate your pain on average?                                           | <b>0.60</b> | 0.39  | -0.18        | 0.38  | 0.11  | -0.19 | 0.03  |
