# Supplementary figures and images for: Validation of the Korean Version of the Patient-Reported Outcomes Measurement Information System 29 Profile V2.1 among Cancer Survivors
Source: PubMed Central journal article supplement — Cancer Res Treat. 2021 Apr 9;54(1):10–9. doi: 10.4143/crt.2020.1200 (PMC8756127; doi:10.4143/crt.2020.1200), 2021-04-09

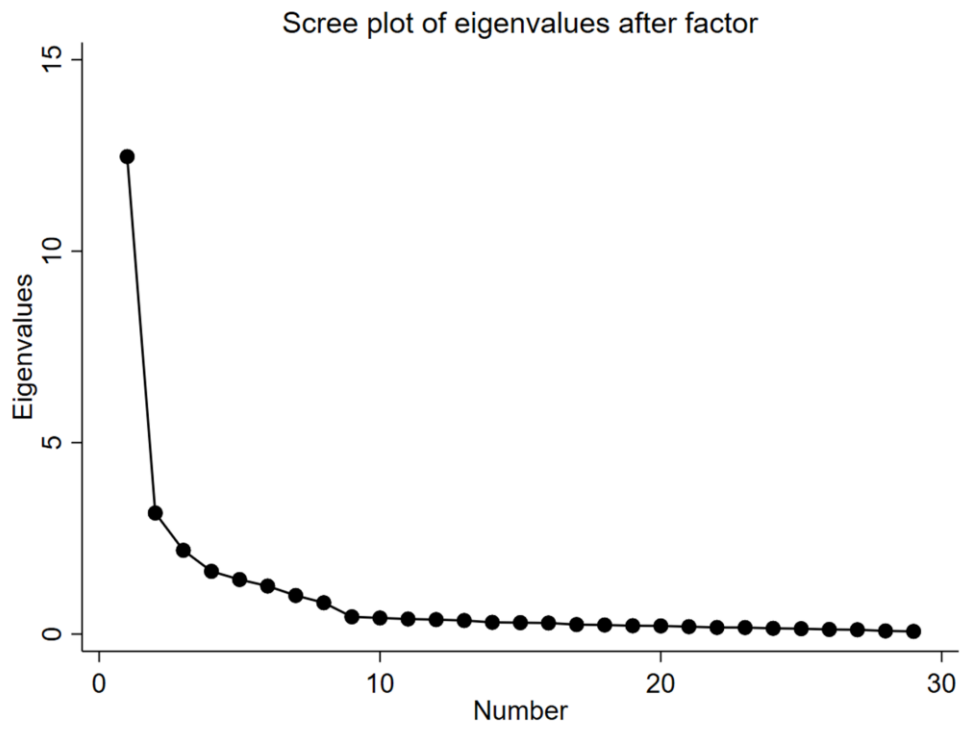

**S1 Fig.** Scree plot for principal component analysis.

Supplement: crt-2020-1200_S1_Fig.pdf [file crt-2020-1200_S1_Fig.pdf]
